# Supplementary material for: Hybrid CuCoO–GO enables ultrasensitive detection of antibiotics with enhanced laser desorption/ionization at nano-interfaces
Source: Royal Society of Chemistry journal article supplement (doi:10.1039/c8sc03692f), 2018-10-08
Supplement: c8sc03692f1.pdf [file c8sc03692f1.pdf]

## Supporting Information

### Hybrid CuCoO-GO Enables Ultrasensitive Detection of Antibiotics with Enhanced Laser Desorption/Ionization at Nano-interfaces

Enhui Wu<sup>a, §</sup>, Kun Feng<sup>a, §</sup>, Rui Shi<sup>a, §</sup>, Rui Lv<sup>a</sup>, Fuzhong Ouyang<sup>a</sup>, Shawn S.C. Li<sup>b</sup>, Jun Zhong<sup>a\*</sup>, Jian Liu<sup>a\*</sup>

<sup>1</sup> Institute of Functional Nano and Soft Materials (FUNSOM), Jiangsu Key Laboratory for Carbon-based Functional Materials and Devices, Joint International Research Laboratory of Carbon-based Functional Materials and Devices, Soochow University, Suzhou, Jiangsu Province 215123, China.

<sup>2</sup> Department of Biochemistry, Western University, London, Ontario N6A 5C1, Canada.

\*Corresponding authors:

E-mail: jliu@suda.edu.cn; jzhong@suda.edu.cn

§ These authors contributed equally to this work.

# Index of Supporting information

|                                                                            |           |
|----------------------------------------------------------------------------|-----------|
| Fig. S1: XPS and FTIR of CuCoO-GO .....                                    | Page 3    |
| Fig. S2: The contact angle measurements .....                              | Page 4    |
| Fig. S3: Noise baselines of CuCoO-GO, CuO-GO, GO .....                     | Page 5    |
| Fig. S4: Reproducibility of Mass spectra signals .....                     | Page 6    |
| Fig. S5: Mass spectra of milk sample without analyte .....                 | Page 7    |
| Table S1: MRL and LOD values of seven antibiotics .....                    | Page 8    |
| Fig. S6: MS of seven antibiotics at LOD concentration .....                | Page 9-10 |
| Fig. S7: Bacterial viability of <i>E.coli</i> and <i>S.aureus</i> .....    | Page 11   |
| Fig. S8: SEM of <i>E.coli</i> and <i>S.aureus</i> incubated with SDS ..... | Page 12   |
| Fig. S9: Comparison of CuO, CuCoO, and CuCoO-GO .....                      | Page 13   |
| Fig. S10: XAS of SDZ, CuCoO-GO and CuCoO-GO-SDZ .....                      | Page 14   |
| Fig. S11: Fourier transform curves .....                                   | Page 15   |
| Fig. S12: MS of additional chemical analogs.....                           | Page 16   |

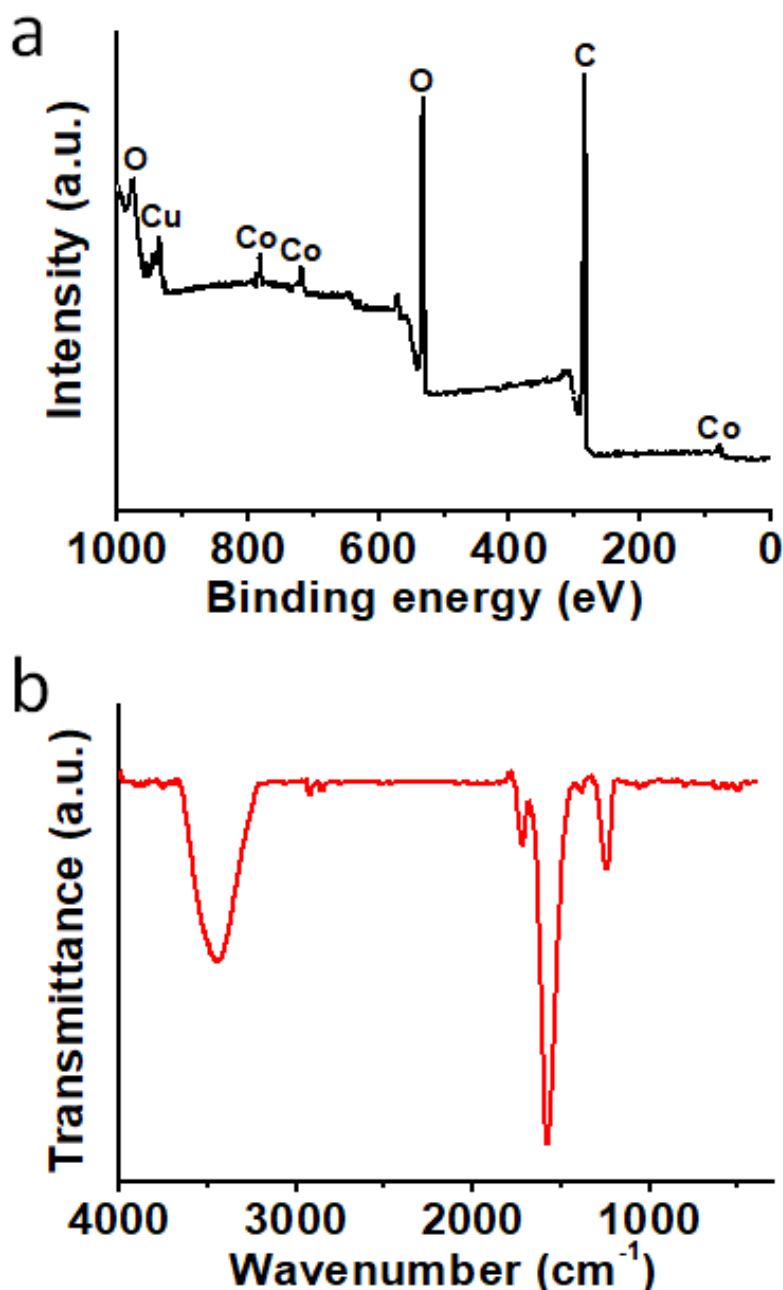

Fig. S1 (a) XPS spectrum of CuCoO-GO, with the peaks attributed to O, C, Cu and Co element as specified. (b) FTIR spectrum of CuCoO-GO. The peaks at 3400 cm<sup>-1</sup> and 1570 cm<sup>-1</sup> were contributed by the O–H and C=O stretching mode. The peak at 1250 cm<sup>-1</sup> was attributed to the epoxy groups.

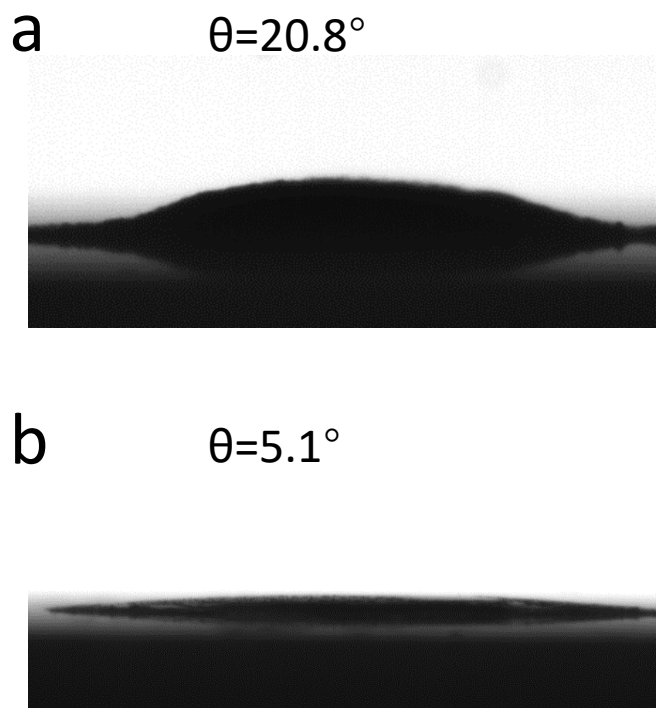

Fig. S2 The contact angle measurements of (a) GO, (b) CuCoO-GO. The images were recorded by contact angle measurement instrument (DataPhysics OCA).

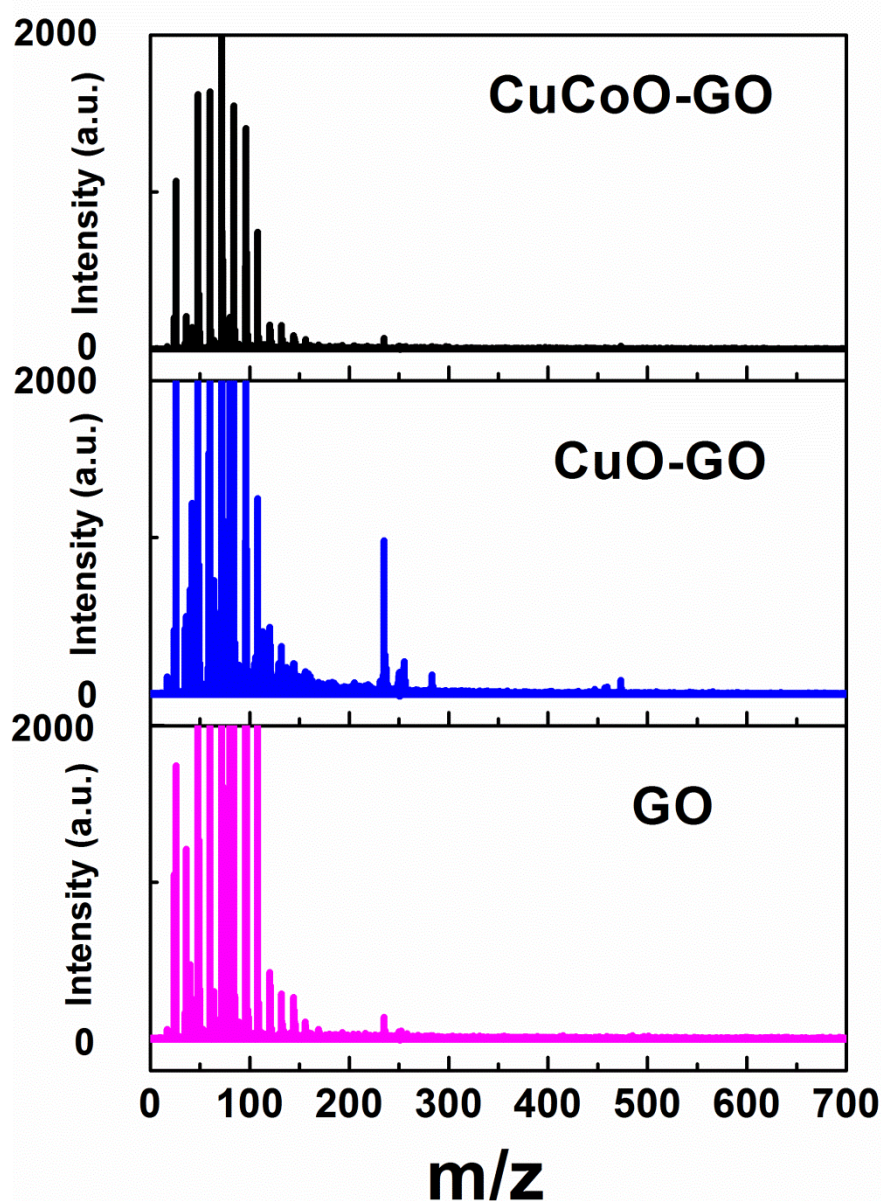

Fig. S3 The background noise of CuCoO-GO, CuO-GO, GO matrices in the negative-ion mode. There are some background noise in the range of  $m/z$  0~150 for all of the three types of matrices. Noteworthy, the noise baseline of CuCoO-GO is lower than that of GO by several folds under the identical laser pulse energy level. The laser spot size was approximately 50~100  $\mu\text{m}$ . The accumulation of 3000 laser shots was applied for each spectrum.

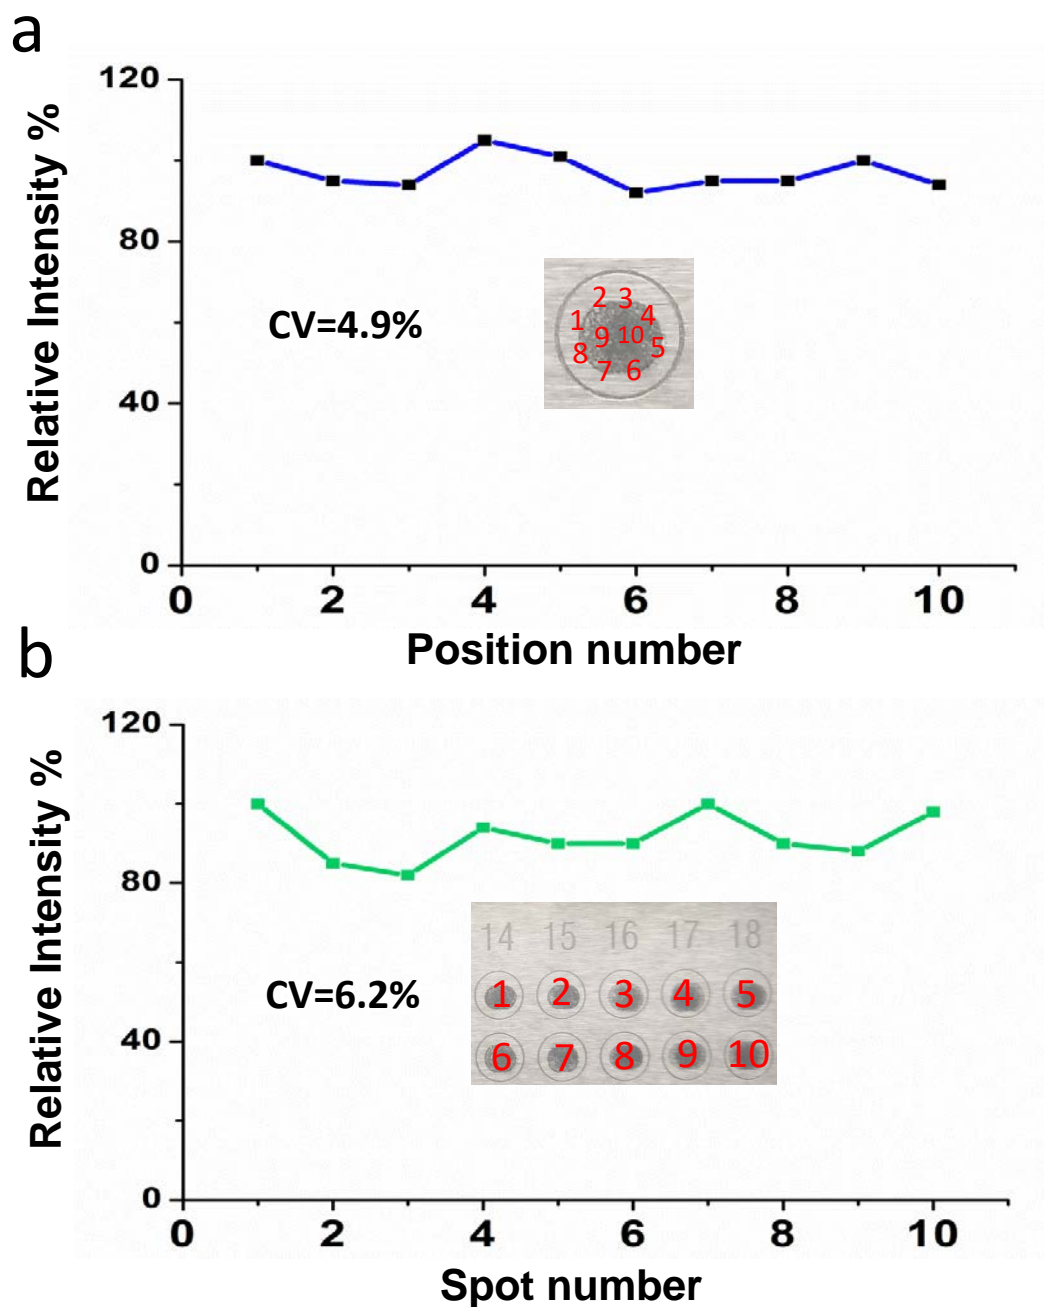

Fig. S4 Highly reproducible MS signals by using the CuCoO-GO matrix. Analyte: SDZ. (a) 10 different positions in a single spot. (B) 10 different spots in the 2×5 array. The coefficient of variation (CV) values: only 4.9% in the position-to-position tests (a) or 6.2% in the spot-to-spot tests (b).

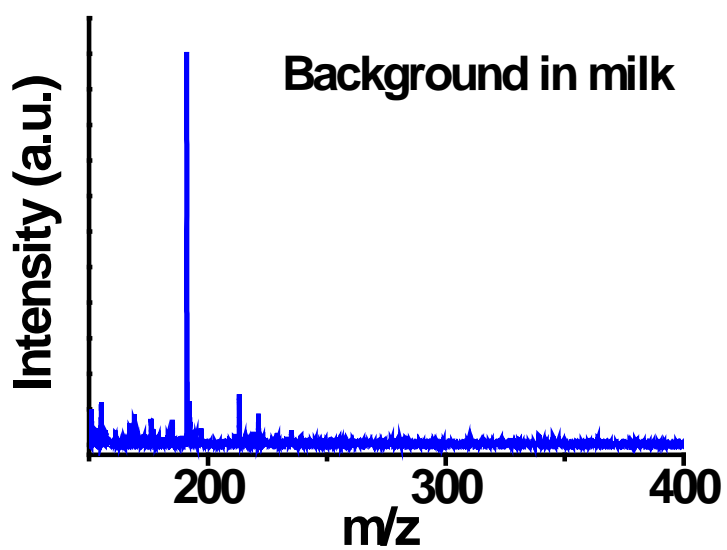

Fig. S5 MALDI-TOF-MS spectra of milk sample without analyte in the negative-ion mode with CuCoO-GO matrix.

Table S1. MRL and LOD values of the different antibiotics in reported literature and in our work by using CuCoO-GO as matrix.

| Antibiotics      | Structure                                                                           | MRL<br>(ug/L) | Others matrix<br>LOD (ug/L) | Our Work<br>LOD (ug/L) | Ref. |
|------------------|-------------------------------------------------------------------------------------|---------------|-----------------------------|------------------------|------|
| Sulfadiazine     | 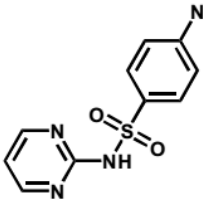   | 100           | 250                         | 0.5                    | 15   |
| Sulfamethoxazole |    | 100           | 203                         | 8.5                    | 15   |
| Tetracycline     |   | 100           | 79.9                        | 40                     | 38   |
| Benzylpenicillin |  | 4             | 0.4                         | 0.12                   | 39   |
| Norfloxacin      |  | 100           | 11.1                        | 5.8                    | 40   |
| Streptomycin     |  | 200           | 87                          | 23                     | 41   |
| Ampicillin       |  | 4             | $1.4 \times 10^3$           | 2.7                    | 42   |



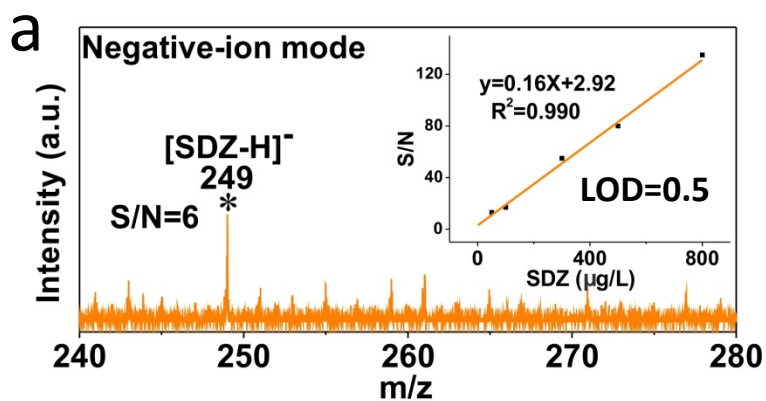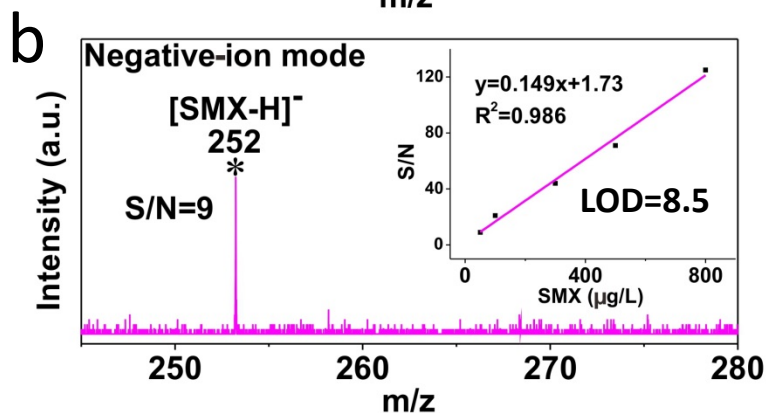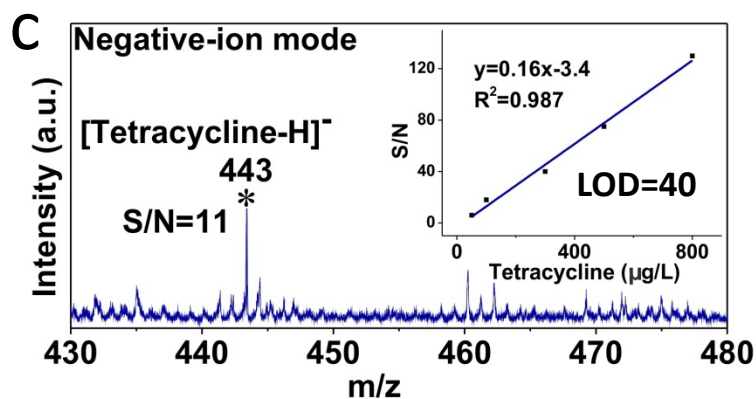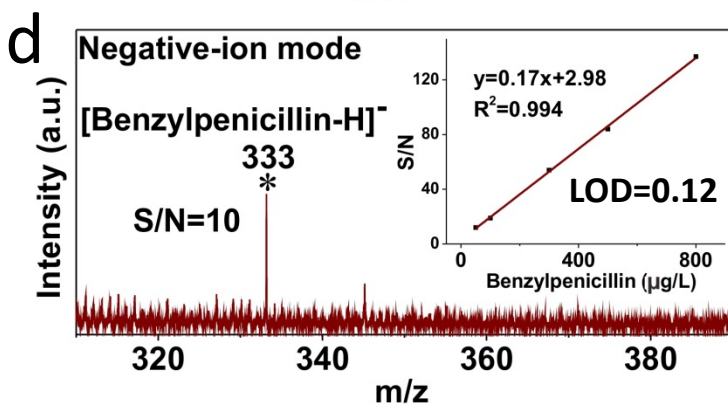

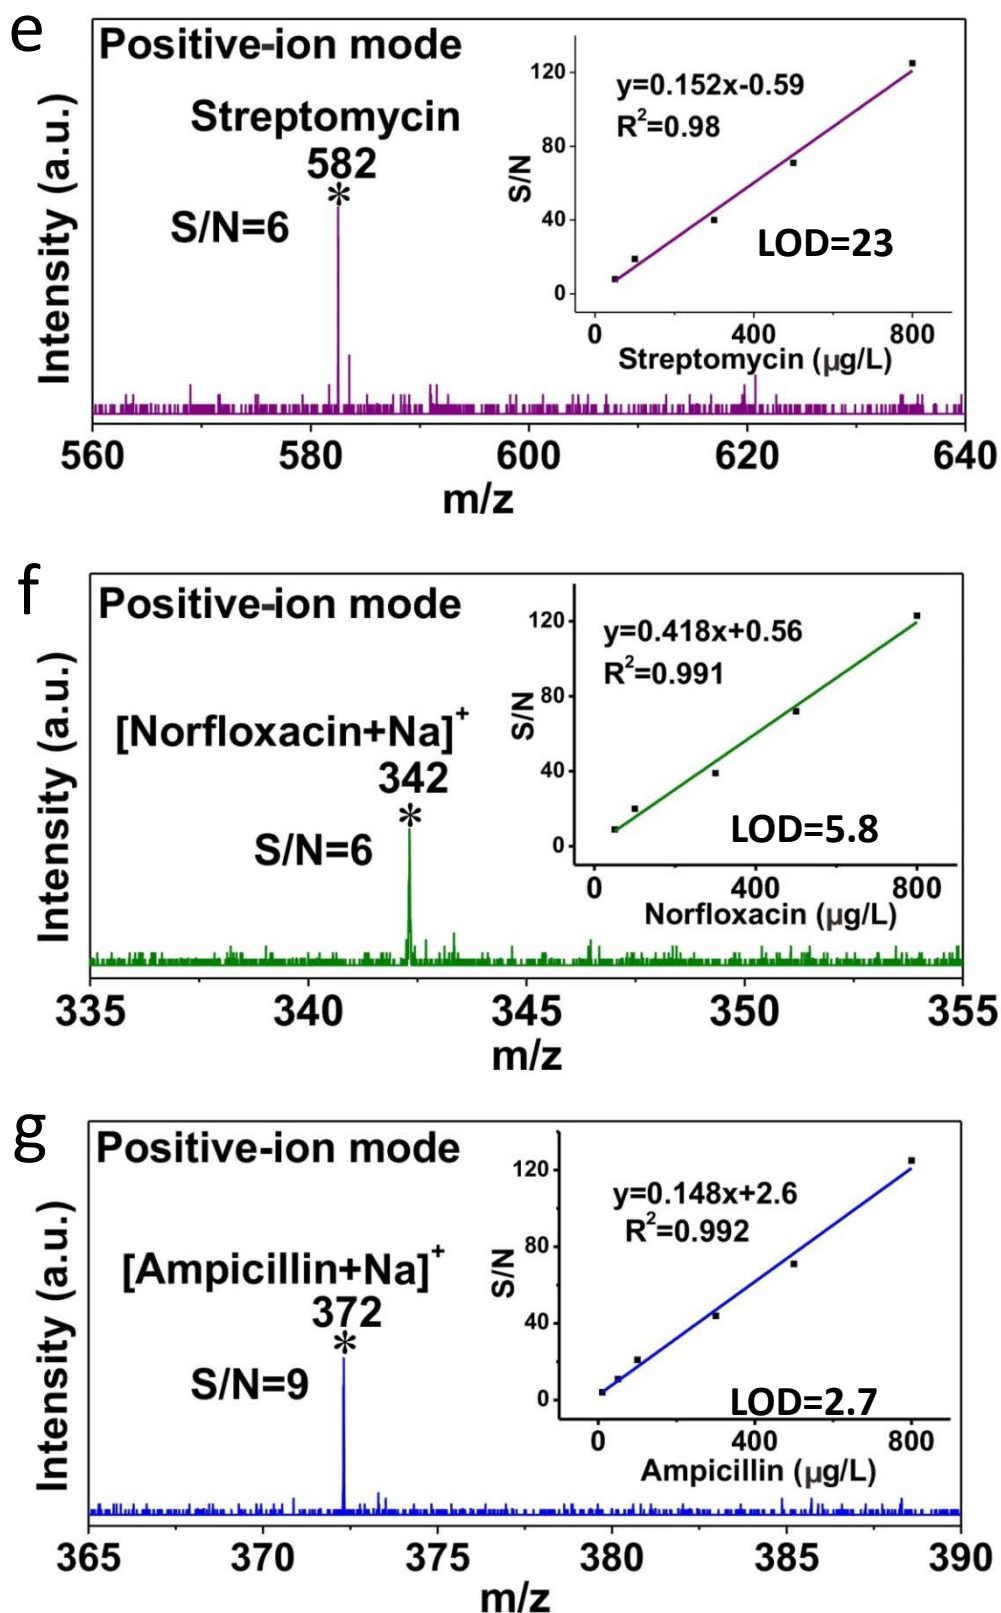

Fig. S6 MALDI-TOF mass spectra of seven antibiotics (a-g, as specified in the legend) using CuCoO-GO matrix. Inset: The linear fitting curves and corresponding LOD values ( $\mu\text{g/L}$ ).

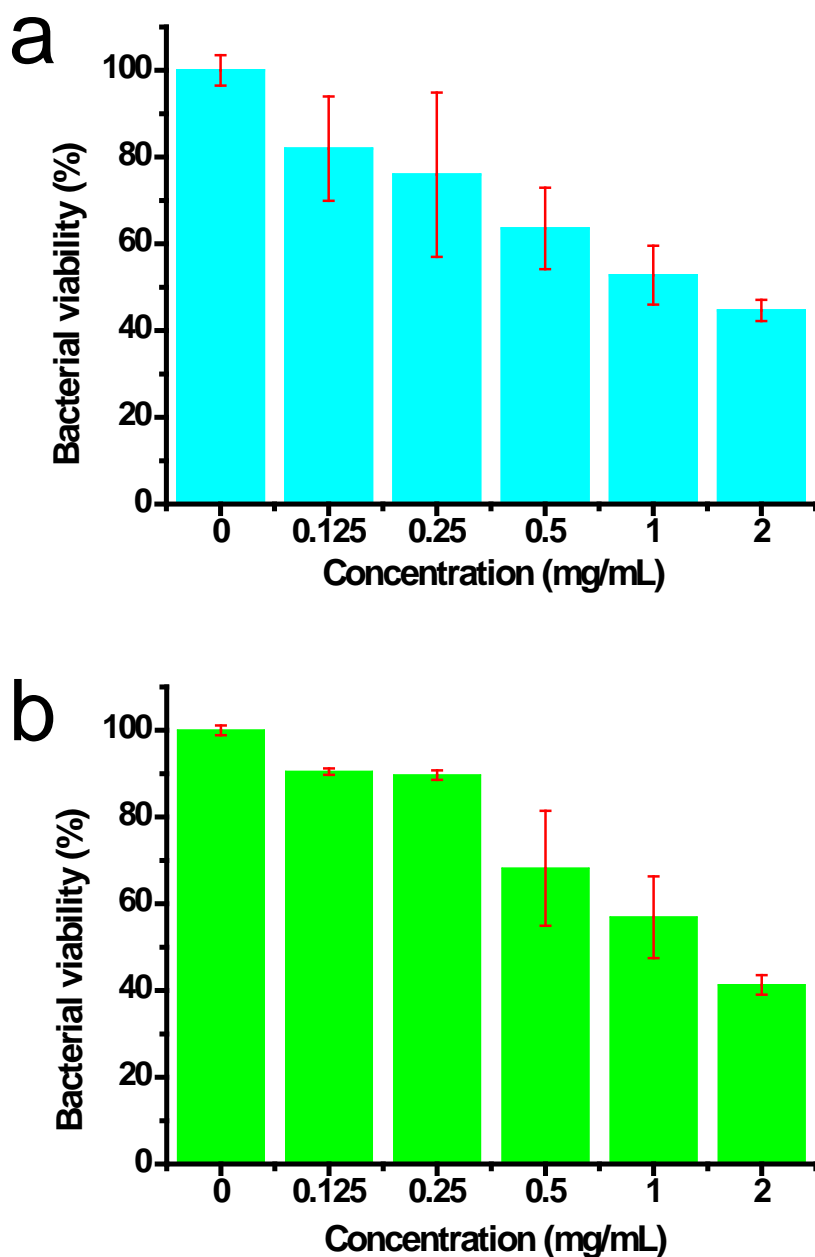

Fig. S7 Bacterial viabilities of (a) *E.coli* and (b) *S.aureus* incubated with SDS at the specified concentrations, according to the broth dilution test in standard AST experiments. OD600 values of the solutions were recorded by a Varioskan Flash (Thermo Scientific Company, USA). The bacterial samples incubated without SDS were used as the blank control for normalization. The MIC<sub>50</sub> values were determined to be nearly 1 mg/mL or 2 mg/mL for *E.coli* and *S.aureus* respectively. Each data points were collected from 2 separate batches. Each of the batches contained a repetition of 4 in parallel. Error bar: standard deviation.

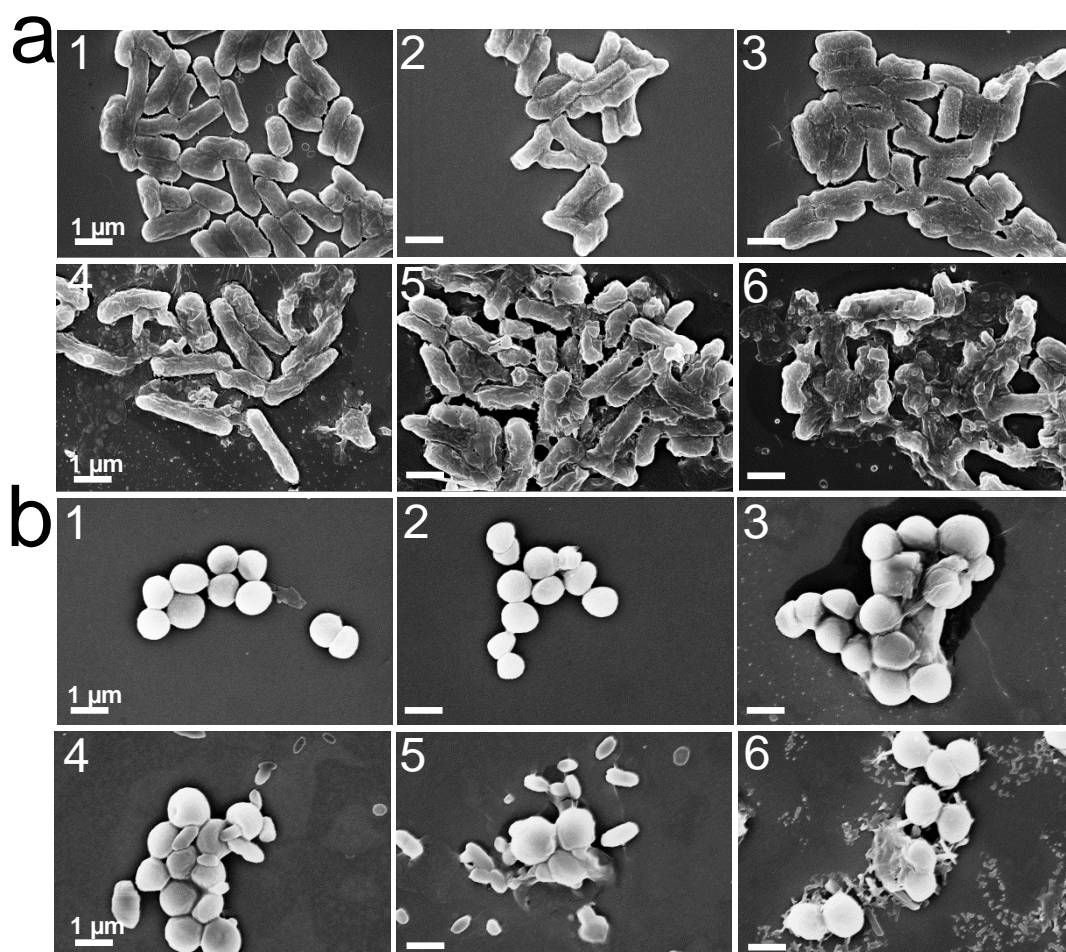

Fig. S8 Scanning electron microscope (SEM) images of (a) *E. coli* and (b) *S. aureus* after incubation with different concentrations of SDS. SDS concentrations in the images #1 ~ #6: 0, 0.125, 0.25, 0.5, 1, 2 mg / mL, respectively.

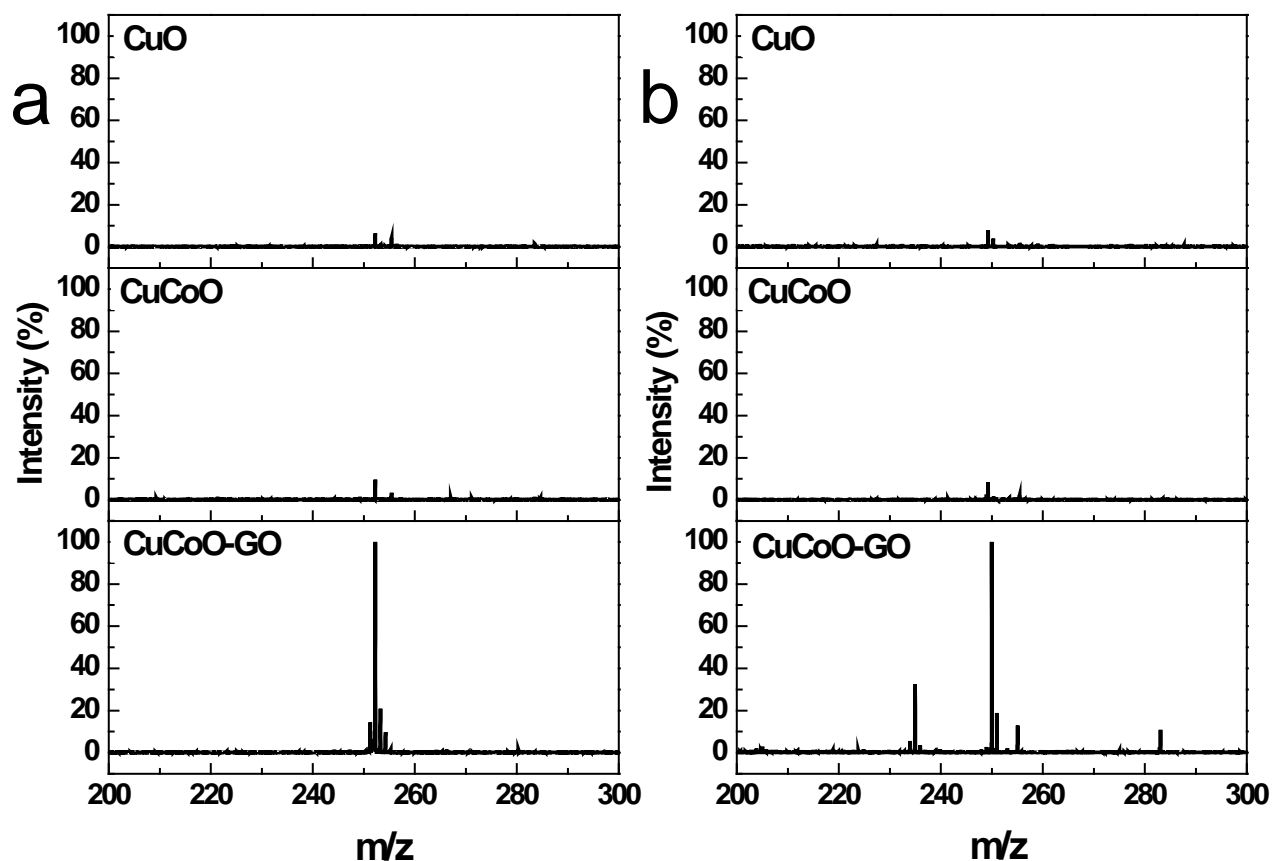

Fig. S9 Mass spectra of SMX (a) and SDZ (b) using CuO, CuCoO, and CuCoO-GO matrices. The MALDI MS detection was performed in the negative-ion mode. The laser spot size was approximately 50~100  $\mu\text{m}$ . The accumulation of 3000 laser shots was applied for each spectrum.



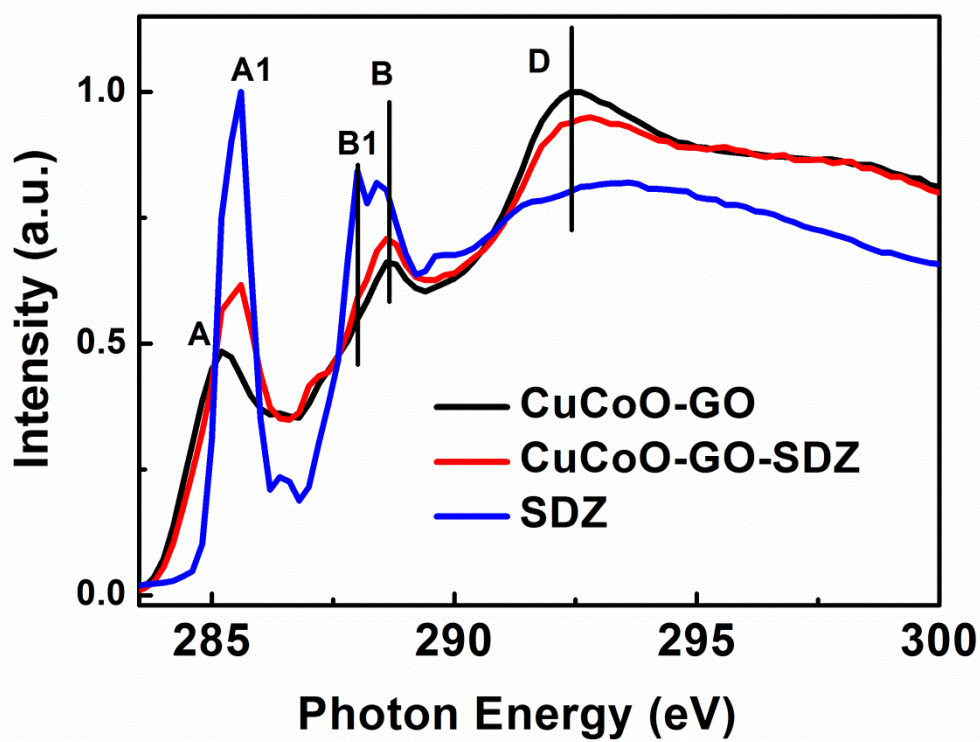

Fig. S10 XAS spectra of SDZ, CuCoO-GO and CuCoO-GO-SDZ at C K-edge.

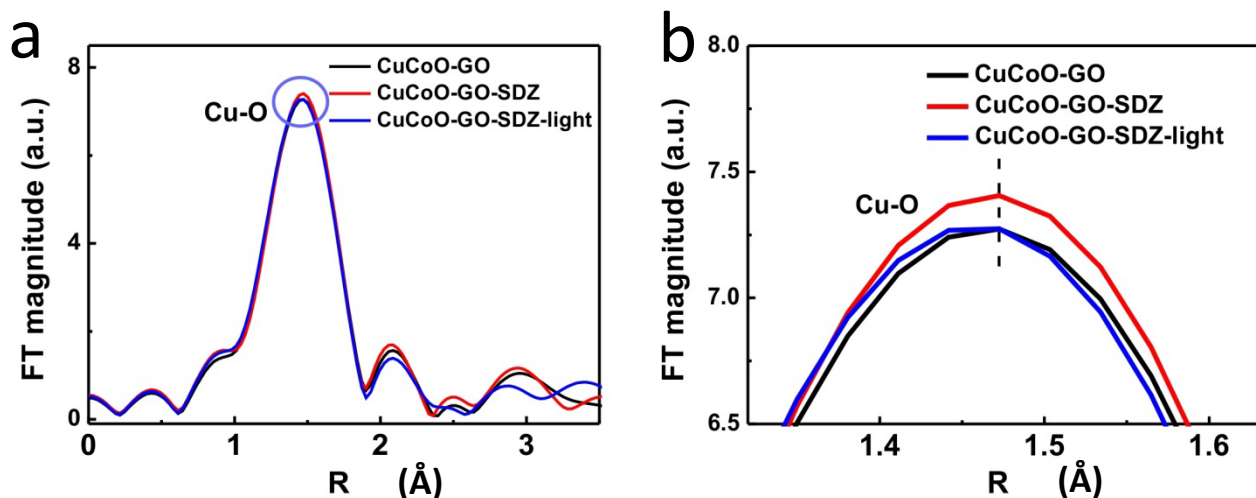

Fig. S11 (a) Fourier transform curves of the *in situ* Extended X-ray Absorption Fine Structure (EXAFS) data for CuCoO-GO at Cu K-edge. (b) Zoomed-in view of the left peak in (a).

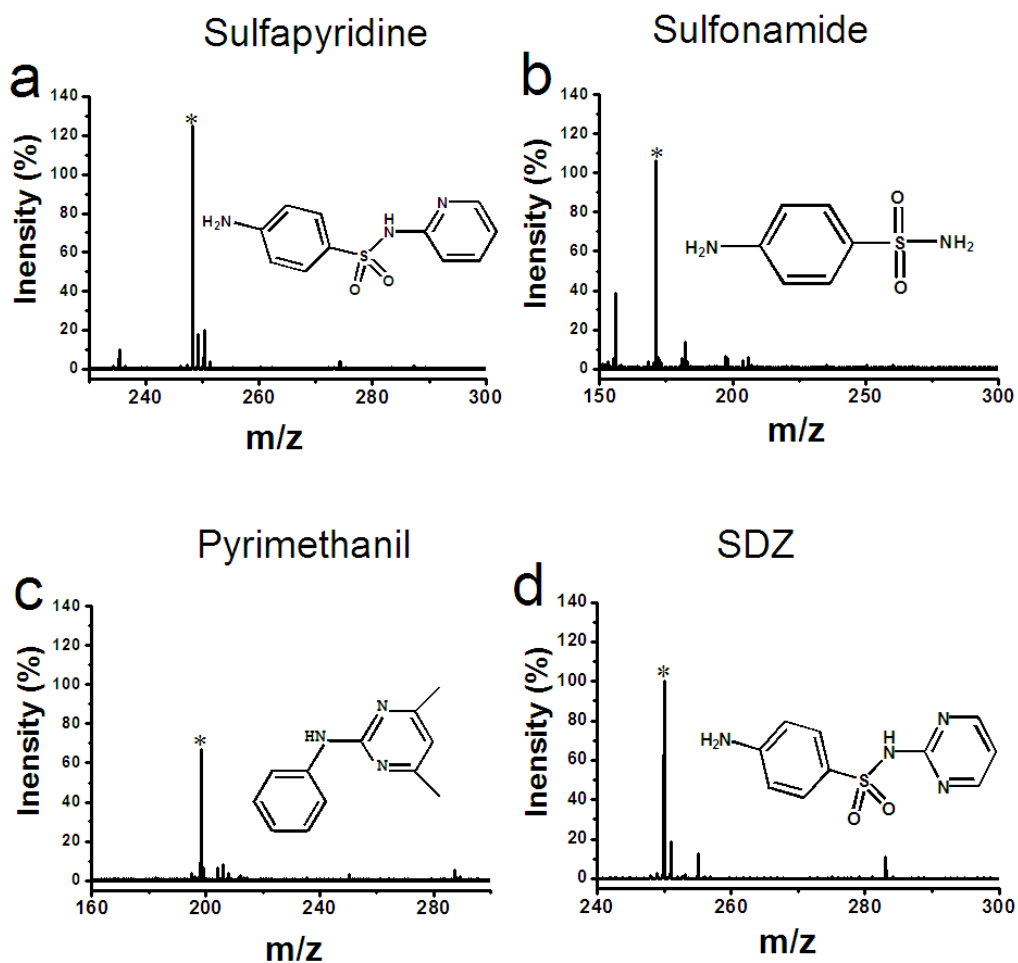

Fig. S12 Mass spectra of (a)Sulfapyridine, (b)Sulfonamide, (c) Pyrimethanil, (d) SDZ using CuCoO-GO matrix in the negative-ion mode. The laser spot size was approximately 50~100  $\mu\text{m}$ . The accumulation of 3000 laser shots was applied for each spectrum.
